# Supplementary material for: Synthesis and characterization of amidoxime modified calix[8]arene for adsorption of U(vi) in low concentration uranium solutions
Source: Royal Society of Chemistry journal article supplement (doi:10.1039/c6ra23764a), 2016-01-01

## **Electronic Supplementary Information (ESI)**

### **Synthesis and characterization of amidoxime modified calix[8]arene for adsorption of U(VI) in low concentration uranium solution**

**Xin Lu, Shengnan He, Dongxiang Zhang,\* Alemtsehay Tesfay Reda, Cong Liu, Jian Feng and Zhi Yang**

*School of Chemistry and Chemical Engineering, Beijing Institute of Technology, Beijing, 102488, P. R. China*

Fig. S1.  $^1\text{H}$  NMR of C8A-AO:

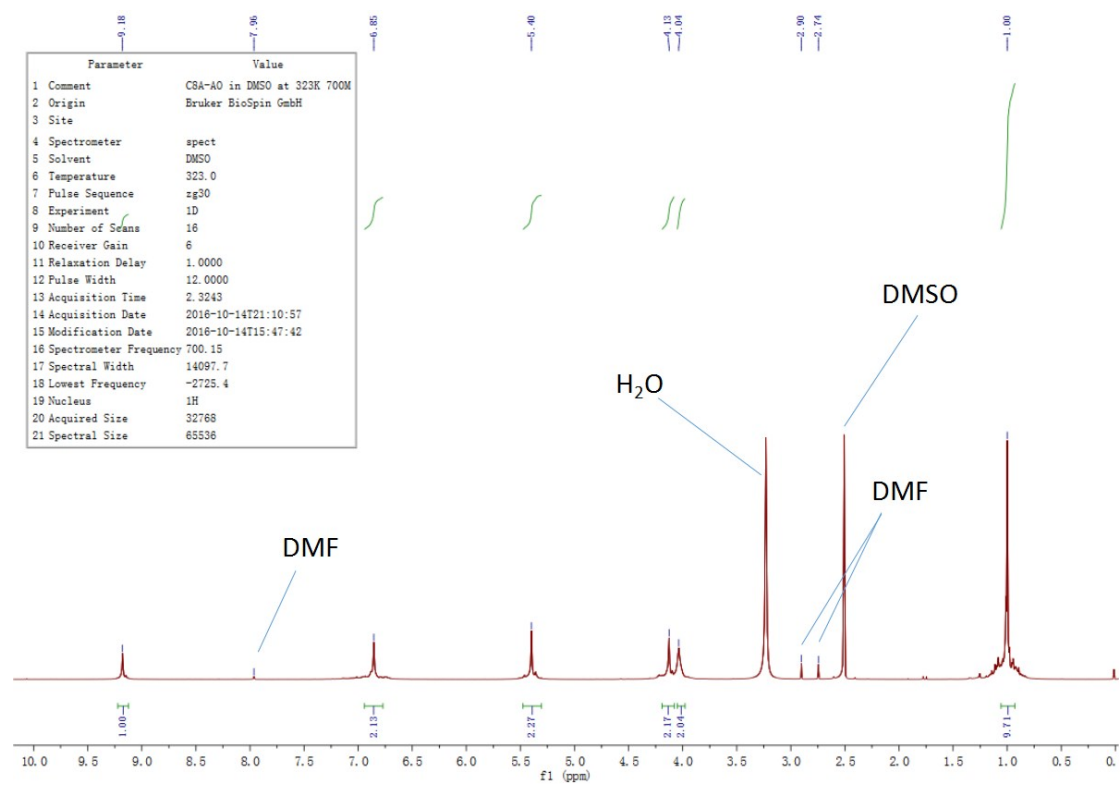

Fig. S2.  $^{13}\text{C}$  NMR of C8A-AO:

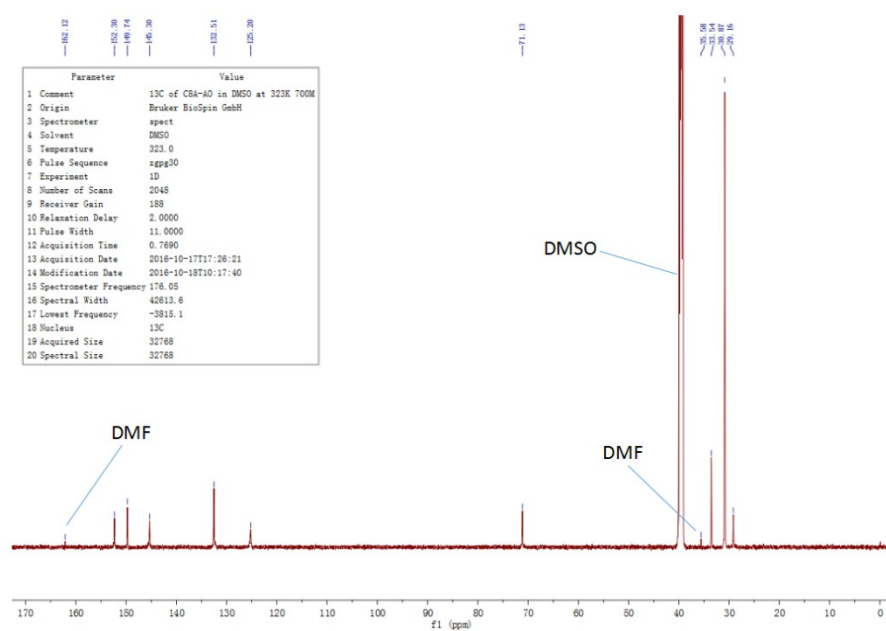

Fig. S3. ESI-MS spectra of C8A-AO:

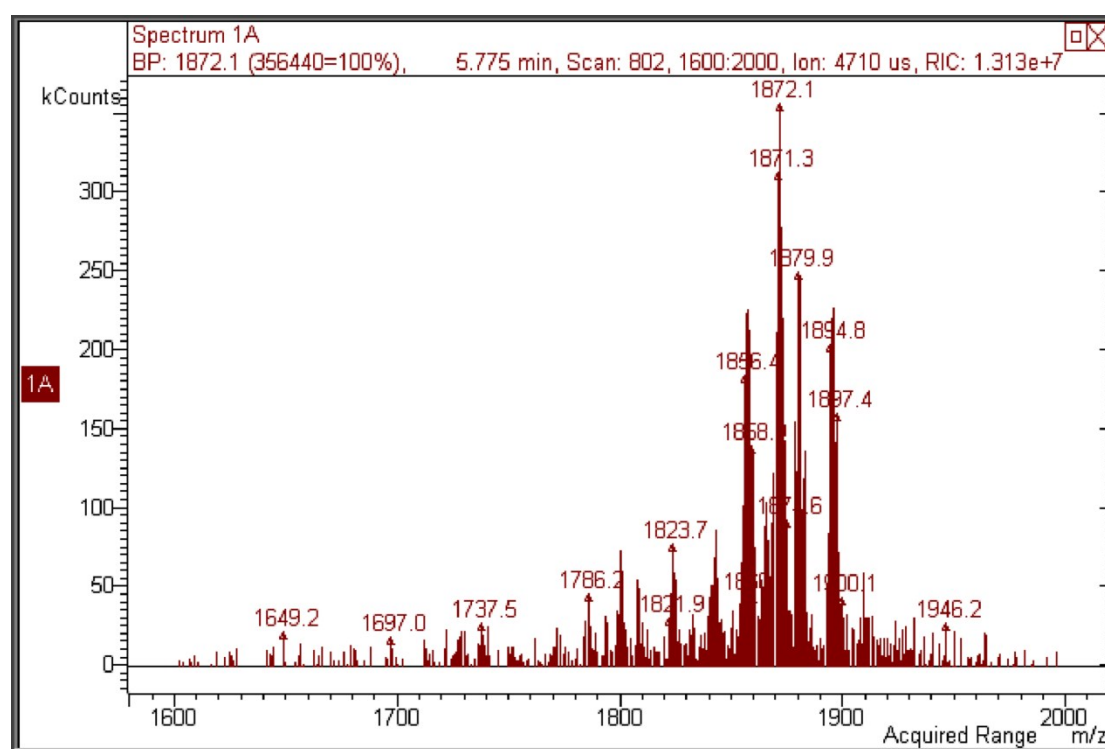

Supplement: c6ra23764a1.pdf [file c6ra23764a1.pdf]
